# Supplementary material for: Medical students’ perspectives on training and professional concerns: a cross-sectional survey in Spain
Source: Research Square preprint supplement (doi:10.21203/rs.3.rs-7185505/v1), 2025-09-22
Supplement: Supplementary file 1 [file a0d62d3dc09ad5557768ec5f.docx]

SURVEY: “CHALLENGES OF MODERN MEDICINE” FOR 5-6TH-YEAR MEDICAL STUDENTS

1. General Information

| Age:  Gender: Female / Male / Other  Ethnicity/Cultural background:  Religion:  Do you have a previous degree or professional training? Yes / No  Have you worked at any time so far? Yes / No  Do you have dependents (children, minors, dependent persons, etc.)? Yes / No |
| --- |

2. What do you believe are the main challenges of modern medicine? Please list them:

-

-

-

3. Do you feel that you are graduating “prepared” for the professional world?

Yes / No

4. Do you believe that medical education is more comprehensive than it used to be?

Strongly agree / Agree / Neutral / Disagree

5. Based on your perception, how would you evaluate the following aspects compared to previous generations?

| Technology | -5 -4 -3 -2 -1 0 +1 +2 +3 +4 +5 |
| --- | --- |
| Teaching quality | -5 -4 -3 -2 -1 0 +1 +2 +3 +4 +5 |
| Research training | -5 -4 -3 -2 -1 0 +1 +2 +3 +4 +5 |
| Inclusivity of minority groups | -5 -4 -3 -2 -1 0 +1 +2 +3 +4 +5 |
| Humanization | -5 -4 -3 -2 -1 0 +1 +2 +3 +4 +5 |
| Deontological ethics | -5 -4 -3 -2 -1 0 +1 +2 +3 +4 +5 |
| Comunication | -5 -4 -3 -2 -1 0 +1 +2 +3 +4 +5 |
| Doctor-patient relationship | -5 -4 -3 -2 -1 0 +1 +2 +3 +4 +5 |
| Access to medical studies | -5 -4 -3 -2 -1 0 +1 +2 +3 +4 +5 |
| Dignified death | -5 -4 -3 -2 -1 0 +1 +2 +3 +4 +5 |

6. What aspects do you believe should be improved in the field of medicine? Please mention three.
